# Supplementary material for: Microfluidic production of nanoscale perfluorocarbon droplets as liquid contrast agents for ultrasound imaging
Source: Royal Society of Chemistry journal article supplement (doi:10.1039/c7lc00056a), 2017-01-01
Supplement: c7lc00056a1.pdf [file c7lc00056a1.pdf]

## Supporting Information

### Microfluidic production of nanoscale perfluorocarbon droplets as liquid contrast agents for ultrasound imaging

Xiaonan Xu,<sup>a</sup> Ruyuan Song,<sup>b</sup> Minghao He,<sup>a</sup> Chuan Peng,<sup>c</sup> Miao Yu,<sup>a</sup> Youmin Hou,<sup>a</sup> Huihe Qiu,<sup>a</sup> Ruhai Zou,<sup>\*c</sup> and Shuahuai Yao <sup>\*ab</sup>

<sup>a</sup> Department of Mechanical and Aerospace Engineering, The Hong Kong University of Science and Technology, Hong Kong, China

<sup>b</sup> Bioengineering Graduate Program, Biomedical Engineering Division, The Hong Kong University of Science and Technology, Hong Kong, China

<sup>c</sup> State Key Laboratory of Oncology in South China, Collaborative Innovation Center of Cancer Medicine, Sun Yat-sen University Cancer Center, Guangzhou, China; Department of Ultrasound, Sun Yat-sen University Cancer Center, Guangzhou, China

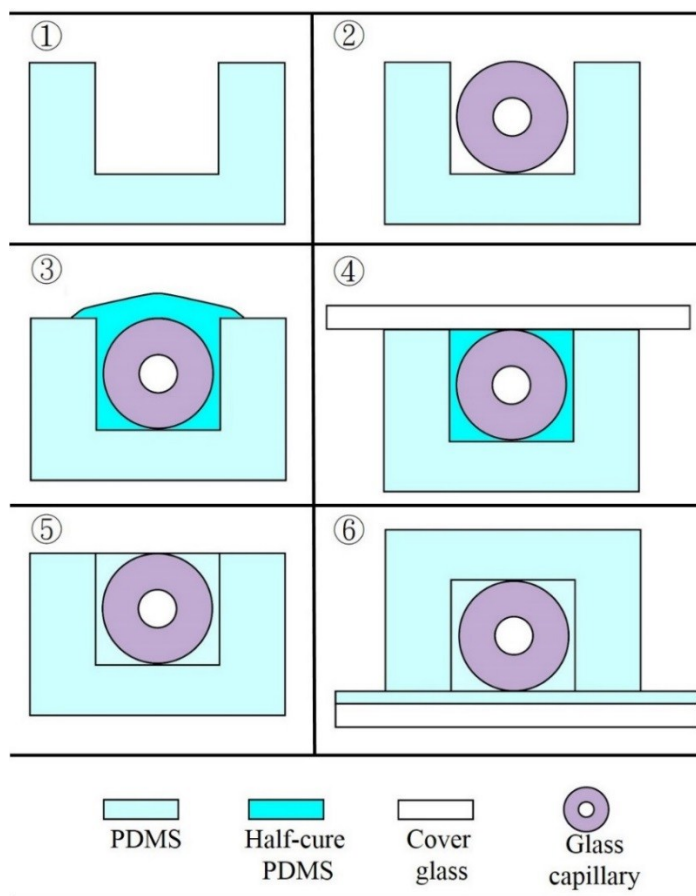

**Fig. S1.** Schematic process of assembling the glass capillary into the PDMS device. Briefly, the glass capillary was first placed on the intersection of the channel (1, 2) and half cured PDMS was applied to seal the corners (3). After removing excess PDMS and flattening the surface (4, 5), the device was bonded with a cover glass after plasma treatment (6).

## The flow circuit model

According to the flow circuit model,<sup>1,2</sup> the volumetric flow rate of a channel can be calculated when the applied pressure and flow resistance are given. The driving pressure  $\Delta P$  is proportional to the volumetric flow rate  $Q$ .

$$\Delta P = Q \cdot R_{hyd} \quad (1)$$

where  $R_{hyd}$  is the hydraulic resistance.

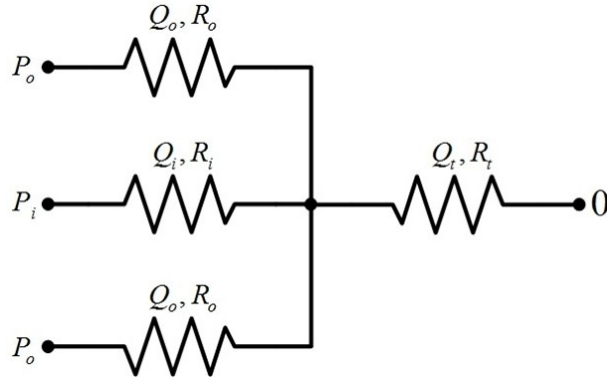

**Fig. S2.** Schematic of the flow resistance circuit network.

A flow resistance circuit model (Fig. S2) is developed based on the design of the microchannels in our device.  $R_i$ ,  $R_o$ , and  $R_t$  are the hydraulic resistances of the inlet centre, side, and exit channels, respectively.  $Q_i$  and  $Q_o$  are the flow rates of the centre and side channels, and  $Q_t = Q_i + 2Q_o$  is the flow rate of the exit channel.  $P_i$  and  $P_o$  are the pressures applied on the centre and side channels, and the pressure on the exit channel is set as zero. In this work, as the glass capillaries are inserted into the channels, the hydraulic resistances in the flow circuit cannot be simply calculated based on the geometry.<sup>1</sup> Instead, we calculate the resistances using the applied pressures and the flow rates obtained via micro-PIV. In micro-PIV, we apply two different sets of pressure ( $P_o^1, P_i^1$ ) and ( $P_o^2, P_i^2$ ) and measure all flow rates correspondingly. The notation 1 and 2 here represents the first and second set of data. Using the flow circuit model, we have:

$$\begin{cases} Q_o^1 R_o + Q_t^1 R_t = P_o^1 \\ Q_i^1 R_i + Q_t^1 R_t = P_i^1 \end{cases} \quad (2)$$

$$\begin{cases} Q_o^2 R_o + Q_t^2 R_t = P_o^2 \\ Q_i^2 R_i + Q_t^2 R_t = P_i^2 \end{cases} \quad (3)$$

From equations (2) and (3), we obtain the flow resistances of different channels:

$$R_o = \frac{P_o^1 Q_t^2 - P_o^2 Q_t^1}{Q_t^2 Q_o^1 - Q_t^1 Q_o^2} \quad (4)$$

$$R_t = \frac{P_o^1}{Q_t^1} - \frac{Q_o^1}{Q_t^1} \frac{(P_o^1 Q_t^2 - P_o^2 Q_t^1)}{(Q_t^2 Q_o^1 - Q_t^1 Q_o^2)} \quad (5)$$

$$R_i = \frac{P_i^1}{Q_i^1} - \frac{P_o^1}{Q_i^1} + \frac{Q_o^1}{Q_i^1} \frac{(P_o^1 Q_t^2 - P_o^2 Q_t^1)}{(Q_t^2 Q_o^1 - Q_t^1 Q_o^2)} \quad (6)$$

Once the flow resistances are obtained, the volumetric flow rates can be calculated for the pressures applied on the device using the equations below:

$$Q_i = \frac{(R_o + 2R_t)P_i - 2R_t P_o}{R_o R_t + R_i R_o + 2R_t R_i} \quad (7)$$

$$Q_o = \frac{(R_i + R_t)P_o - R_t P_i}{R_o R_t + R_i R_o + 2R_t R_i} \quad (8)$$

### Comparison of 2D and 3D flow focusing devices

We tried to make liquid perfluorocarbon (PFC) droplets in a 2D flow focusing device, in which the nozzle width (the smallest width in the centre channel) is 25  $\mu\text{m}$ , same as the orifice diameter in our hybrid 3D focusing device. 41% glycerol/water mixture with 0.5wt% Zonyl FSO-100 and perfluorohexane (PFH,  $\text{C}_6\text{F}_{14}$ ) were used as the continuous phase and dispersed phase, respectively. Fig. S3 shows the PFH droplet formation in this 2D flow focusing device for the disperse phase to continuous phase flow rate ratio ( $Q_d/Q_c$ ) of 0.05, 0.017, and 0.0071. Although the PFH droplet size gradually became smaller as the flow rate ratio decrease, we were unable to obtain the tip-streaming mode for generating extremely small droplets even at  $Q_c/Q_d=0.0071$ . The thread formed at the tip started to retract when the flow rate ratio was further decreased. Fig. S3(b) compares the resulted droplet size using the 2D and 3D flow focusing devices under the approximately flow rate ratio. Obviously the 3D flow focusing device produced much smaller PFC droplets.

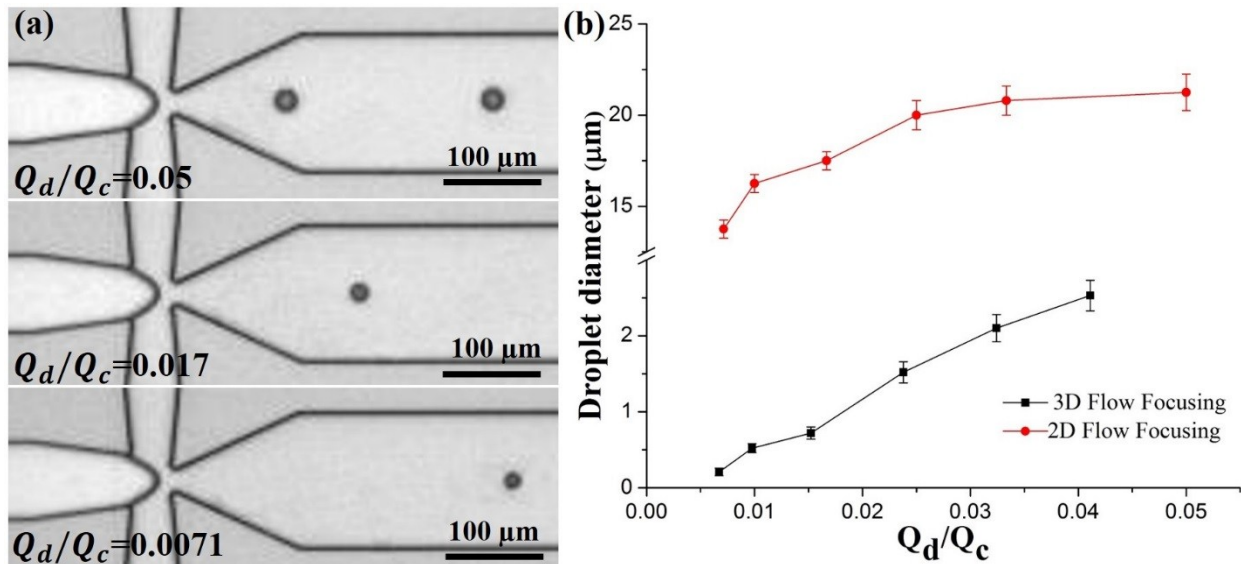

**Fig. S3.** (a) Images of PFH droplet formation in a 2D flow focusing device for the flow rate ratio ( $Q_d/Q_c$ ) at 0.05, 0.017, and 0.0071, respectively. Tip-streaming can hardly be obtained. (b) Comparison of the PFH droplet diameter using the 2D and 3D flow focusing devices.

## References

1. H. Bruus, *Theoretical microfluidics*, Oxford university press Oxford, 2007.
2. L. Jiang and S. Yao, *IEEE Transactions on Nanotechnology*, 2016, **15**, 828-835.
